# Supplementary material for: Bone regeneration by polyhedral microcrystals from silkworm virus
Source: PubMed Central journal article supplement — Sci Rep. 2012 Dec 6;2:935. doi: 10.1038/srep00935 (PMC3515804; doi:10.1038/srep00935), 2012-12-06
Supplement: srep00935-s1.pdf [file srep00935-s1.pdf]

## **SUPPLEMENTARY INFORMATION FILE**

### **Bone regeneration by polyhedral microcrystals from silkworm virus**

**Goichi Matsumoto<sup>a</sup>, Takayo Ueda<sup>b</sup>, Junko Shimoyama<sup>a</sup>, Hitoshi Ijiri<sup>b</sup>, Yasushi Omi<sup>a</sup>, Hisato Yube<sup>a</sup>, Yoshihiko Sugita<sup>c</sup>, Katsutoshi Kubo<sup>c</sup>, Hatsuhiko Maeda<sup>c</sup>, Yukihiro Kinoshita<sup>c</sup>, Duverney Gaviria Arias<sup>d</sup>, Junji Shimabukuro<sup>b</sup>, Eiji Kotani<sup>b</sup>, Shin Kawamata<sup>e</sup>, and Hajime Mori<sup>b, f</sup>**

<sup>a</sup>Department of Oral and Maxillofacial Surgery, Kanagawa Dental College, 82 Inaoka, Yokosuka, Kanagawa 238-8580, Japan.

<sup>b</sup>Insect Biomedical Research Center, Kyoto Institute of Technology, Matsugasaki, Sakyo-ku, Kyoto 606-8585, Japan.

<sup>c</sup>Department of Oral Pathology, School of Dentistry, Aichi-Gakuin University, 1-100 Kusumoto-cho, Chikusa-ku, Nagoya 464-8650, Japan.

<sup>d</sup>Centre for Molecular Biology and Biotechnology Health Sciences, Faculty-Universidad Tecnologica de Pereira, Pereira, Colombia.

<sup>e</sup>Basic Research Group for Regenerative Medicine, Foundation for Biomedical Research and Innovation, TR1308, 1-5-4 Minatojima-minamimachi, Kobe 650-0043, Japan.

<sup>f</sup>Protein Crystal Corporation, 1-12-8 Senba Higashi, Minoh 541-0053, Japan.

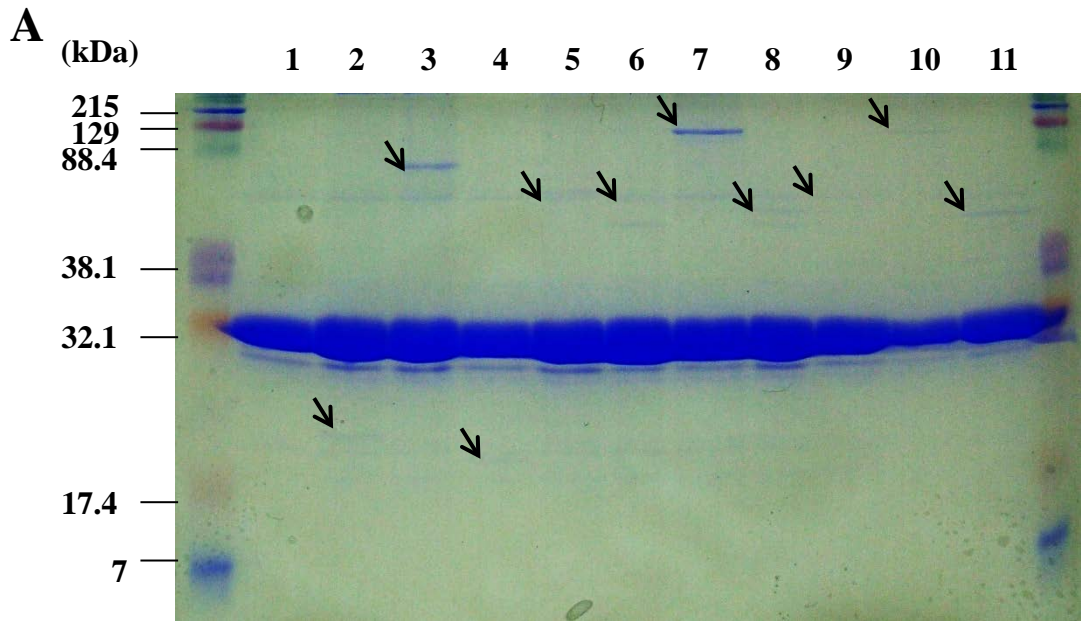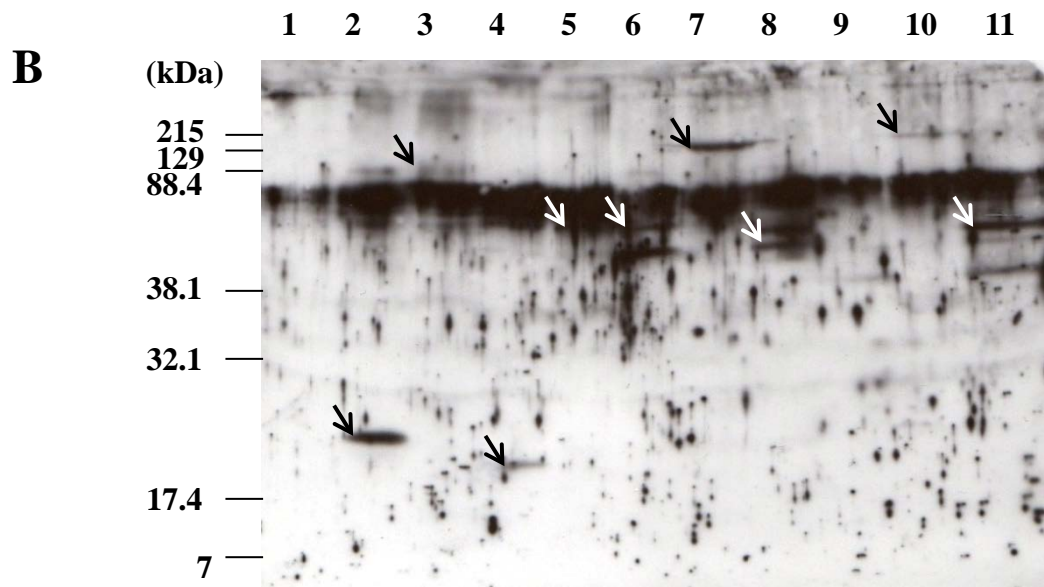

**Figure S1 | Analyses of immobilization of BMP2 into polyhedra by SDS-PAGE (A) and western blot (B).** Lane 1, empty polyhedra. Lanes 2-4, mature BMP-2 fused with VP3-S at the C-terminus, VP3-L and H1 at the N-terminus. Lanes 5-8, Full-length BMP-2 fused with VP3-S at the C-terminus, VP3-S, VP3-L, and H1 at the N-terminus. Lanes 9-11, Pro BMP-2 fused with VP3-S, VP3-L, and H1 at the N-terminus. Arrows show BMP-2 immobilized into polyhedra.

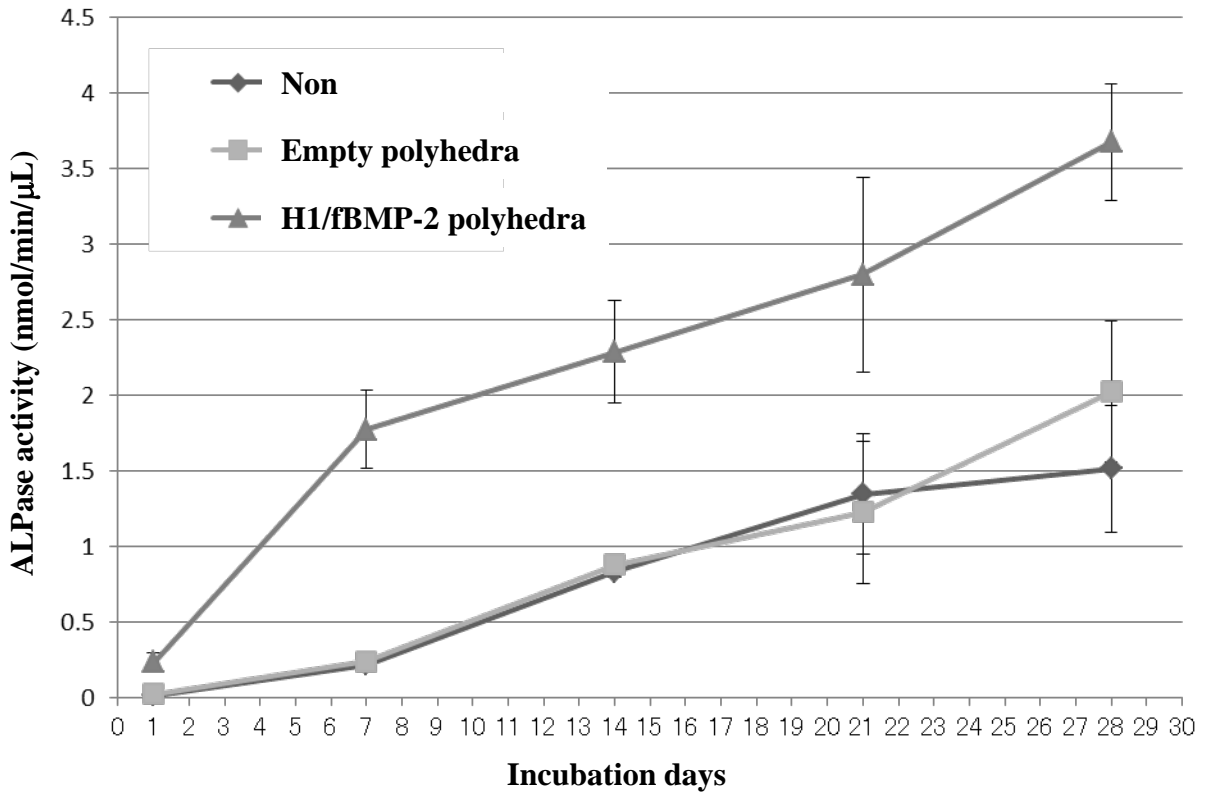

**Figure S2 | Assay of ALPase activity.** Cultured cells in 96-well plates were rinsed with PBS, harvested by treatment with 0.05% trypsin-EDTA and then cells were solubilized with lysis buffer (10 mM NaOH, 0.2% Triton X-100). ALPase activity was detected with LabAssay ALP (Wako Pure Chemical Industries) in triplicate cultures according to the manufacturer's instructions. The dephosphorylation from p-nitrophenyl phosphate was monitored at 405 nm absorbance. A standard curve was prepared with p-nitrophenol. ALPase units were defined as one nanomole of p-nitrophenol released per minute per DNA content. DNA concentration was determined with the QuantiFluor™ dsDNA system (Promega).
